# Supplementary material
Source: MDPI journal article supplement (https://www.mdpi.com/2073-4344/11/7/792)
Supplement: s1 [file s1]

Supplementary Material

# **WO<sub>3</sub> fibers/g-C<sub>3</sub>N<sub>4</sub> Z-scheme heterostructure photocatalysts for simultaneous oxidation/reduction of phenol/Cr (VI) in aquatic media**

**Feidias Bairamis<sup>1</sup> and Ioannis Konstantinou<sup>1,2,\*</sup>**

<sup>1</sup>Department of Chemistry, University of Ioannina, Ioannina 45110, Greece; fmpairam@cc.uoi.gr

<sup>2</sup> Institute of Environment and Sustainable Development, University Research Center of Ioannina (URCI), Ioannina 45110, Greece

\* Correspondence: [iokonst@uoi.gr](mailto:iokonst@uoi.gr) (I.K.); Tel.: +30-26510-08349) (I.K.)

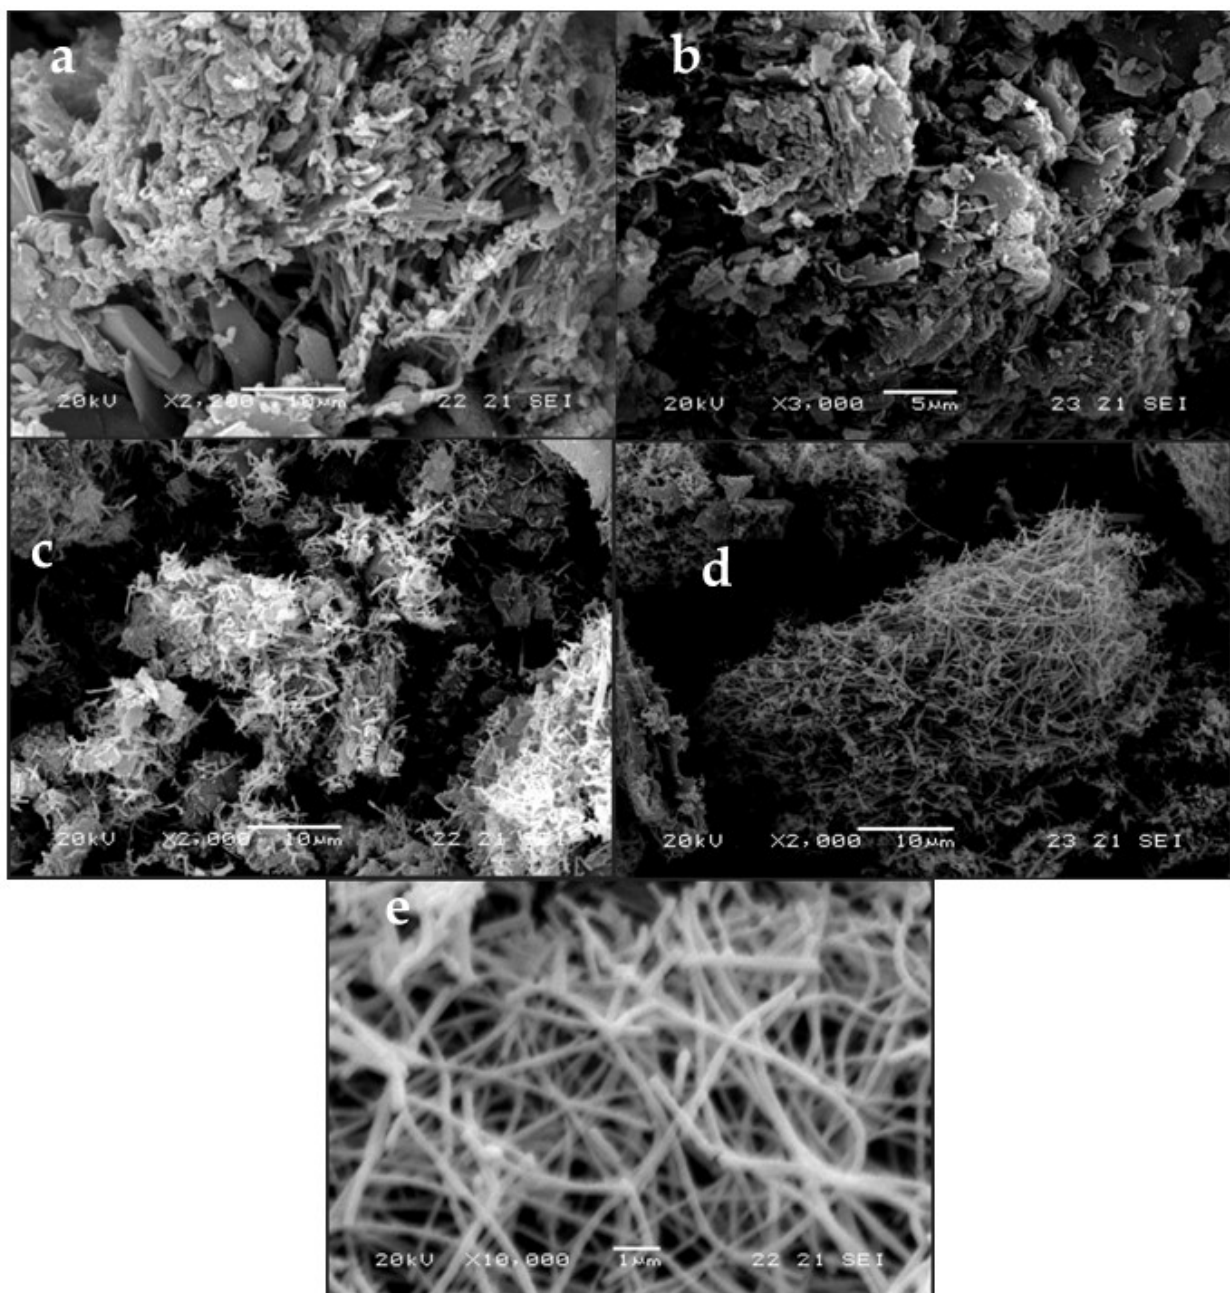

Figure S1. SEM images of electrospun fibers and composite catalysts after calcination (a) g-C<sub>3</sub>N<sub>4</sub>, (b) 1%WCN (c) 8%WCN, (d) 15%WCN and (e) WO<sub>3</sub> fibers.

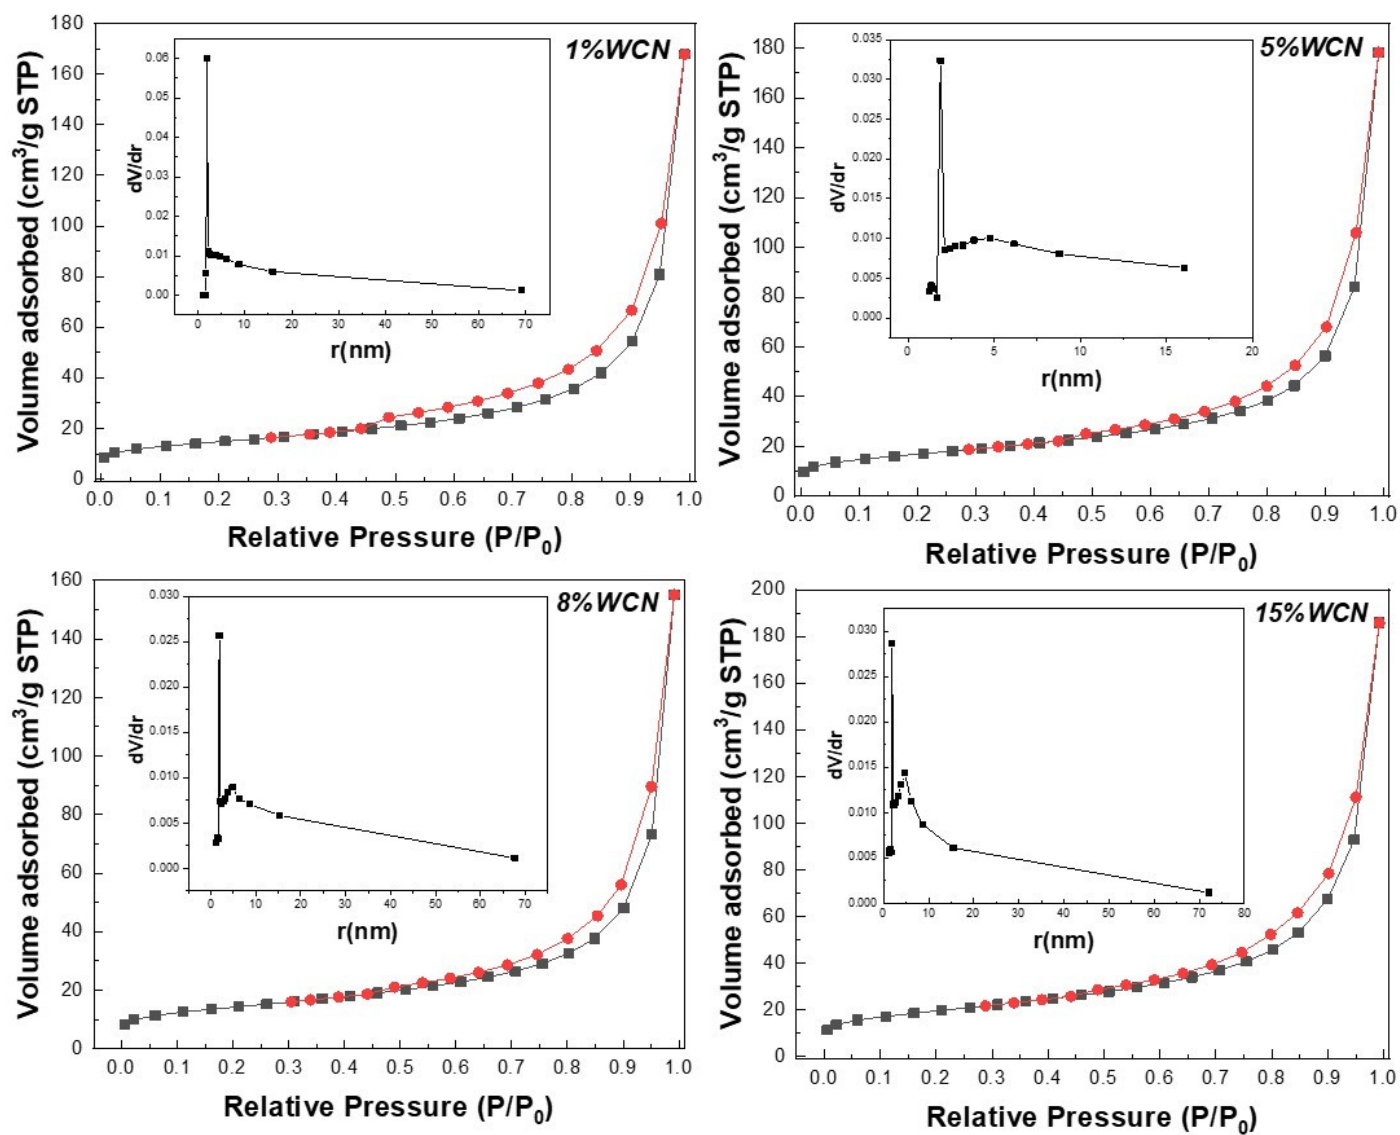

Figure S2. Nitrogen adsorption-desorption isotherms and pore size distributions for the prepared materials 1%WCN, 5%WCN, 8%WCN and 15%WCN.

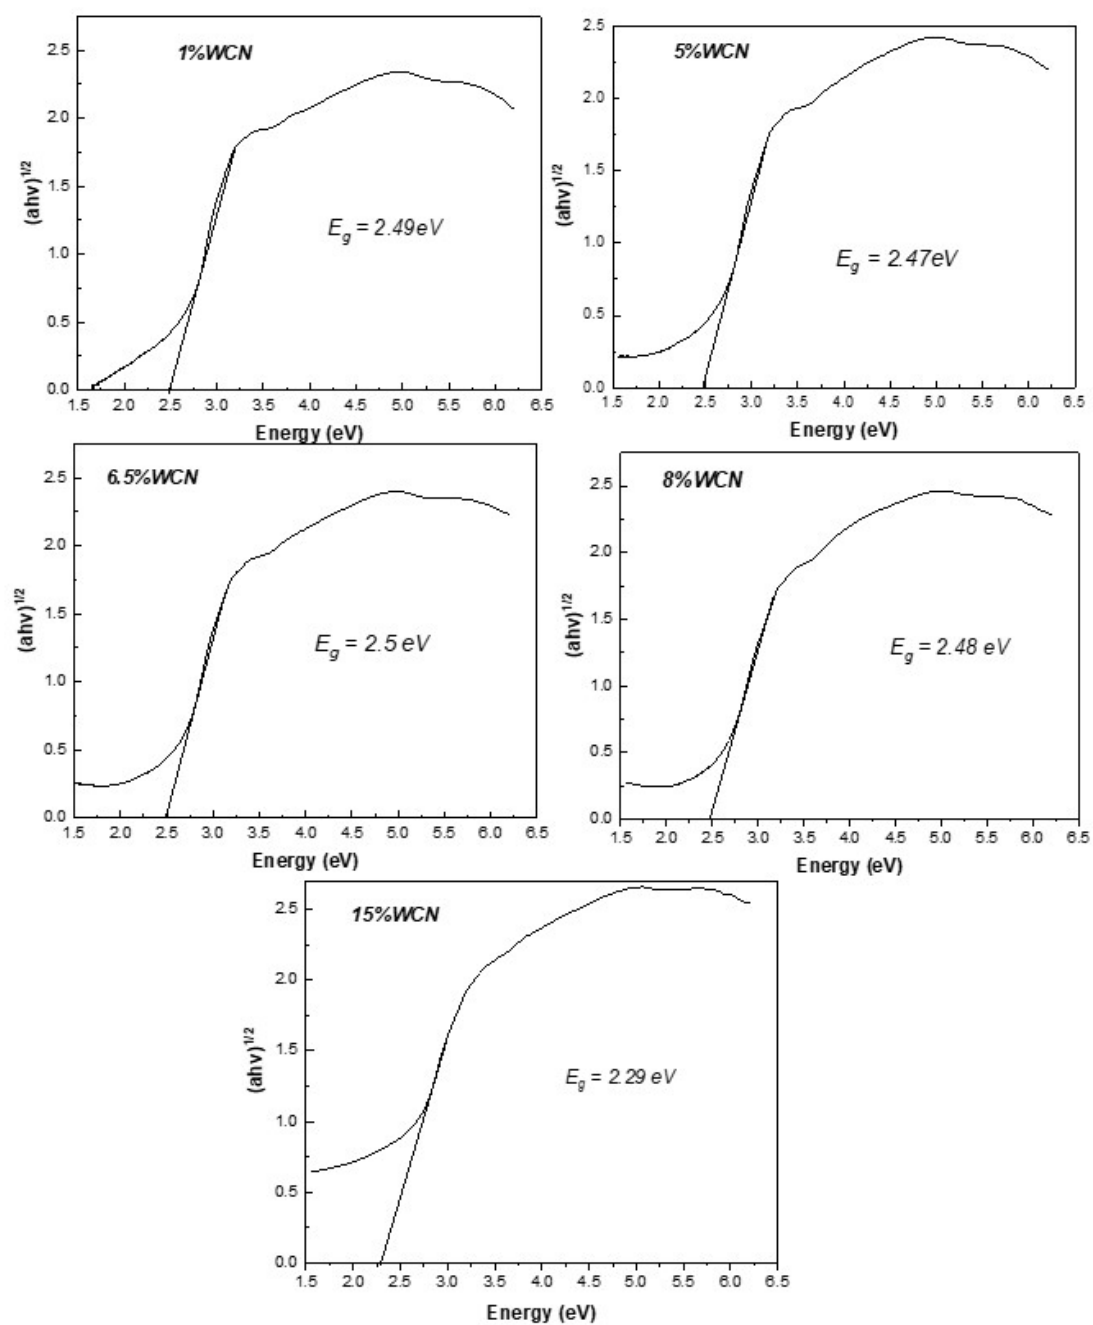

Figure S3. Kubelka-Munk plots for 1%WCN, 5%WCN, 6.5%WCN, 8%WCN and 15%WCN materials.

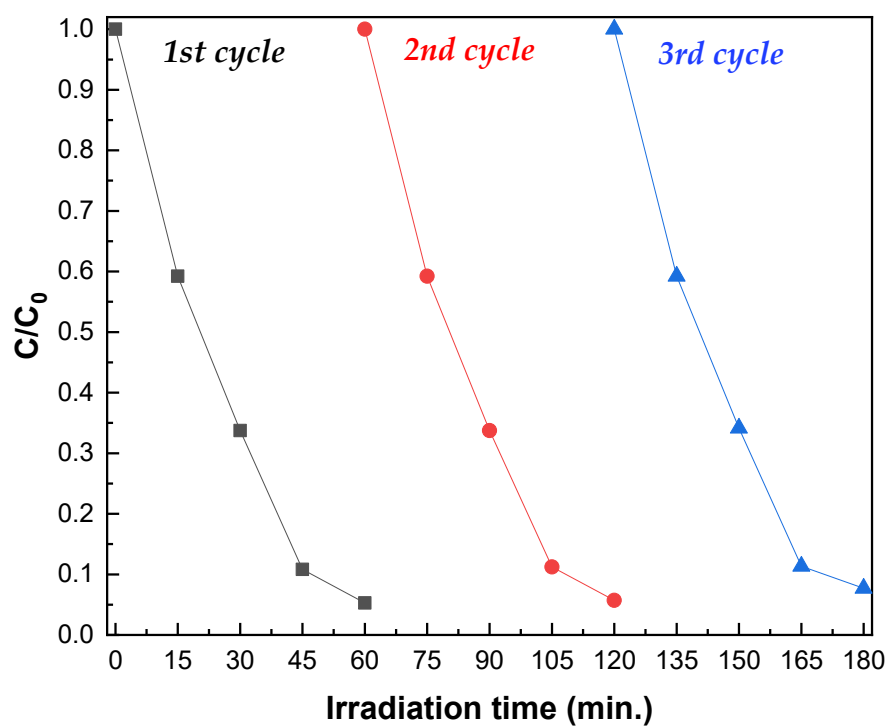

Figure S4. Reusability performance of 6.5%WCN composite catalyst.

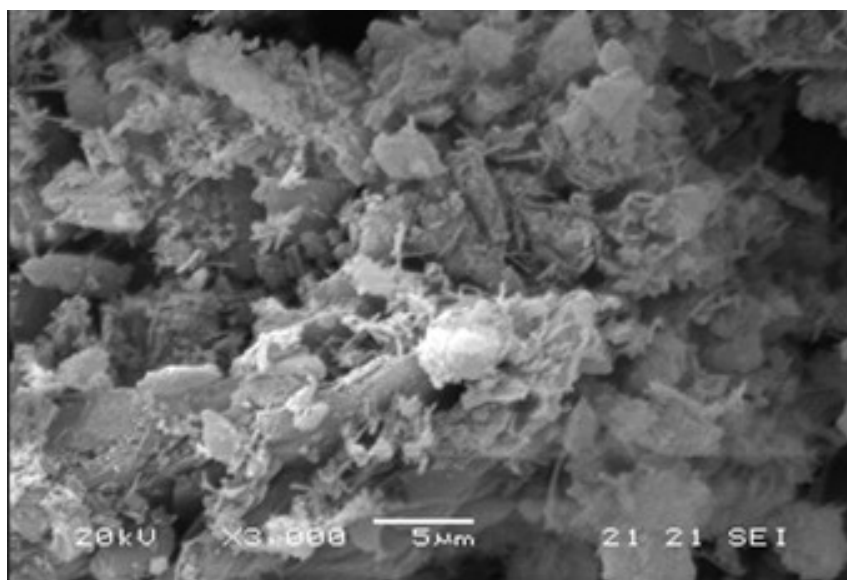

Figure S5. SEM image of catalyst 6.5%WCN after three photocatalytic cycles.

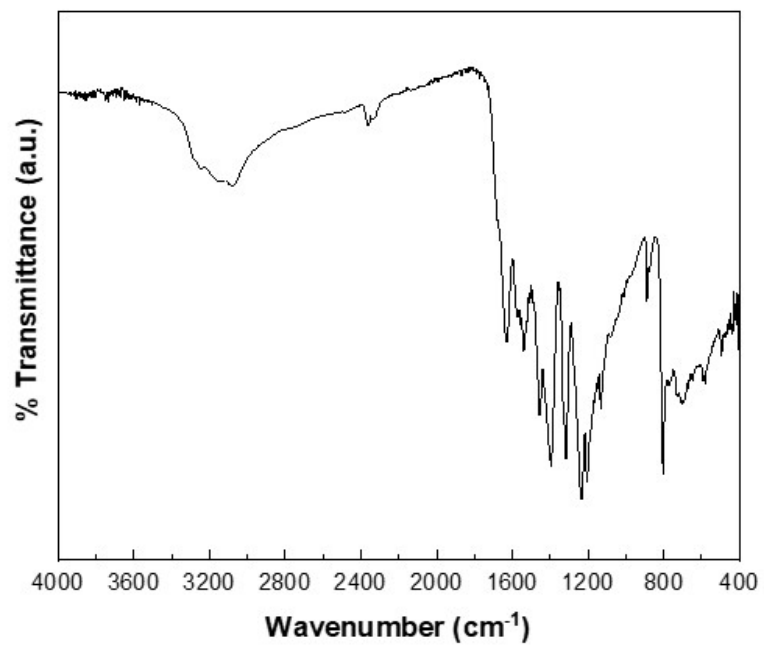

Figure S6. FT-IR spectra of composite material 6.5%WCN after the third photocatalytic cycle.
